# Supplementary material for: Synergistic effects of nanoattapulgite and hydroxyapatite on vascularization and bone formation in a rabbit tibia bone defect model
Source: Royal Society of Chemistry journal article supplement (doi:10.1039/d2bm00547f), 2022-01-01
Supplement: d2bm00547f1.pdf [file d2bm00547f1.pdf]

1 **Table S1. The primer sequences used for RT-qPCR analysis**

| <b>Gene</b>        | <b>Primer/probe</b> | <b>Primer sequences</b>         |
|--------------------|---------------------|---------------------------------|
| <b>Mouse-GAPDH</b> | Forward             | 5'-CACCACCAACTGCTTAGC-3'        |
|                    | Reverse             | 5'-TTCACCACCTTCTTGATGTC-3'      |
| <b>ALP</b>         | Forward             | 5'-GCAGTATGAATTGAATCGGAACAAC-3' |
|                    | Reverse             | 5'-ATGGCCTGGTCCATCTCCAC-3'      |
| <b>RUNX 2</b>      | Forward             | 5'-CTGCAAGCAGTATTTACAACAGAGG-3' |
|                    | Reverse             | 5'-GGCTCACGTCGCTCATCTT-3'       |
| <b>COL1</b>        | Forward             | 5'-GACATGTTTCAGCTTTGTGGACCTC-3' |
|                    | Reverse             | 5'-GGGACCCTTAGGCCATTGTGTA-3'    |
| <b>OCN</b>         | Forward             | 5'-ACCATCTTTCTGCTCACTCTGCT-3'   |
|                    | Reverse             | 5'-CCTTATTGCCCTCCTGCTTG-3'      |
| <b>OPN</b>         | Forward             | 5'-TACGACCATGAGATTGGCAGTGA-3'   |
|                    | Reverse             | 5'-TATAGGATCTGGGTGCAGGCTGTAA-3' |
| <b>OSX</b>         | Forward             | 5'-ATCGAGTACATCTTCAAGCCAT-3'    |
|                    | Reverse             | 5'-GRGAGGTTTGATCCGCATAATC-3'    |
| <b>Human-GAPDH</b> | Forward             | 5'-AATGGGCAGCCGTTAGGAAA-3'      |
|                    | Reverse             | 5'-GCGCCCAATACGACCAAATC-3'      |
| <b>VEGF</b>        | Forward             | 5'-TCCCTTGCTCTACCTCCAC-3'       |
|                    | Reverse             | 5'-AGATGTCCACCAGGGTCTCGATTG -3' |
| <b>ENOS</b>        | Forward             | 5'-TCACCTTCTTCCTGGACATCACCTC-3' |
|                    | Reverse             | 5'-ACCACTTCCACTCCTCGTAGCG-3'    |
| <b>FGF</b>         | Forward             | 5'-CTTCGCCAGGTCATTGAGATCCAT-3'  |
|                    | Reverse             | 5'-TCATCTGCCGCCTAAAGCCATATT-3'  |
| <b>HIF-a</b>       | Forward             | 5'-TGCTCATCAGTTGCCACTTCCAC-3'   |
|                    | Reverse             | 5'-ACAGCATCCAGAAGTTTCCTCACAC-3' |

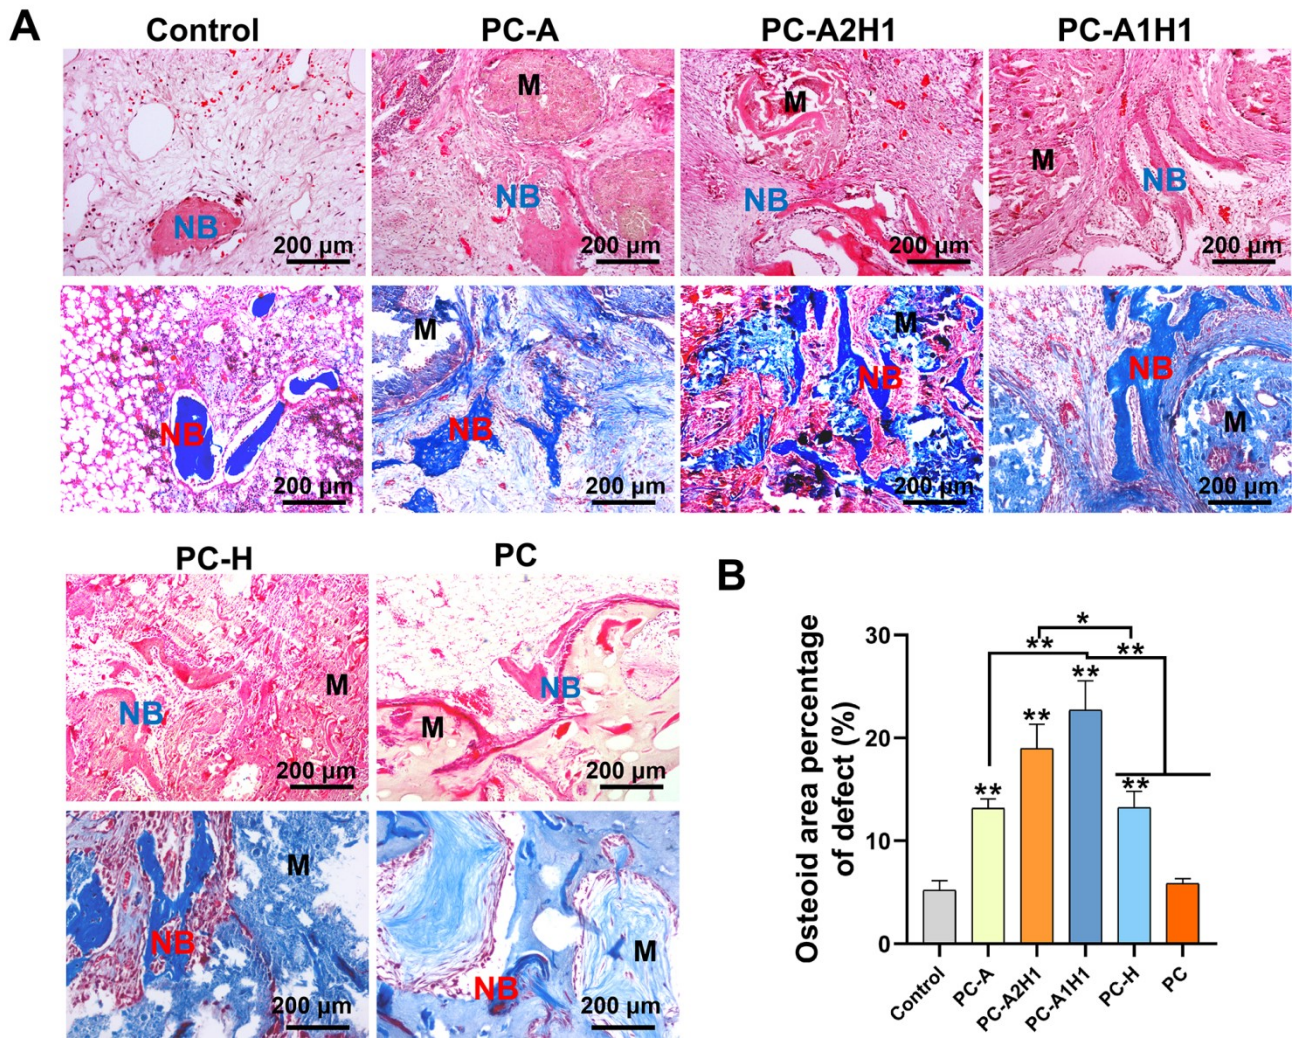

1

2 **Figure S1. Histological staining results for the different groups at 4 weeks postsurgery. (A)** Staining  
 3 with haematoxylin and eosin (H&E) and Masson's trichrome. **(B)** Quantitative analysis of H&E staining and  
 4 Masson's trichrome staining. Data are shown as the mean  $\pm$  standard deviation ( $n = 3$ ). \*  $p < 0.05$ , \*\*  $p <$   
 5  $0.01$ . Bar =  $200 \mu\text{m}$ . Abbreviations: M, scaffold; NB, new bone.



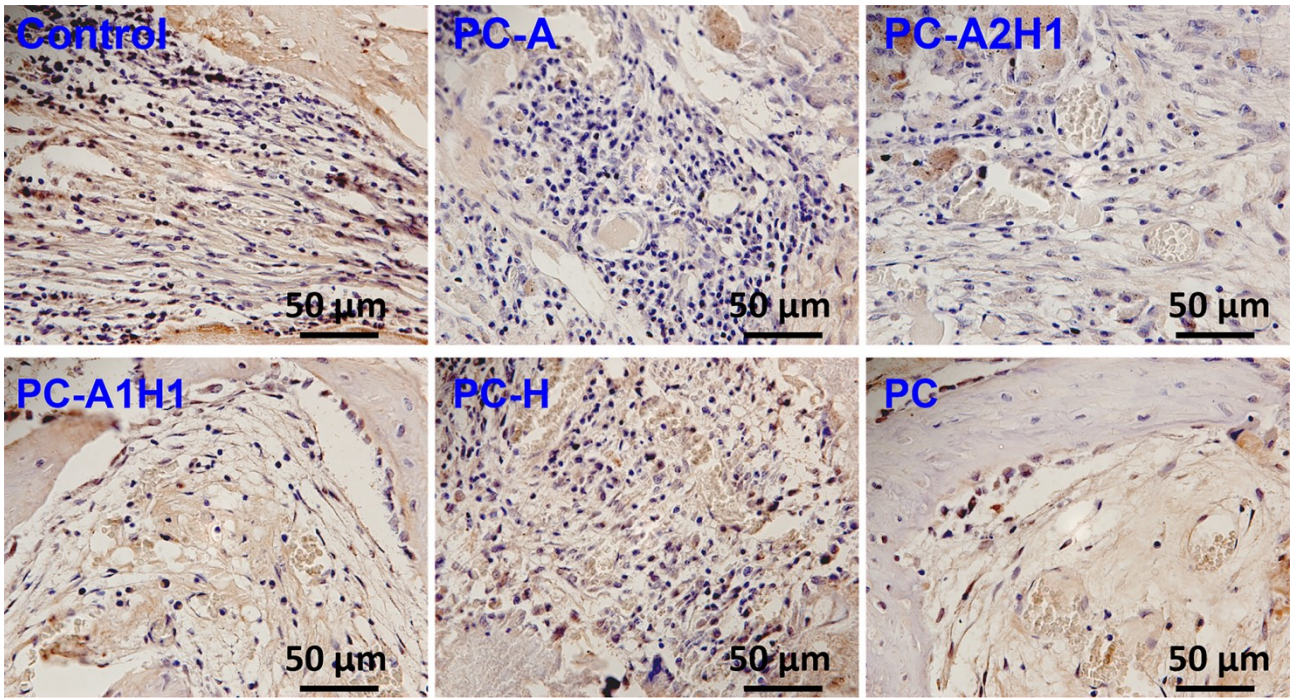

1  
2 **Figure S2. *in vitro* evaluation of the vascularization of different scaffolds 4 weeks after surgery. (A)**  
3 Immunohistochemical (IHC) staining for CD 31 control groups (just the secondary antibody). Bar = 50 μm.

4

5
